# Supplementary material
Source: HighWire-hosted journal article supplement (doi:10.1101/rna.079083.121)
Supplement: Supplemental_Figure_S2.pdf [file Supplemental_Figure_S2.pdf]

281

|               |            |            |            |             |            |            |            |
|---------------|------------|------------|------------|-------------|------------|------------|------------|
| Tetrahymena   | -----      | 00NQYA0000 | 00000F0000 | -----TV     | TKQEADKQKK | SEDEDIHAKE | RFAETLKIES |
| Chondrus      | -----      | VLSAASRSAK | SSKSTNR    | -----FV     | RFGRYKQKQE | QITLPAAEQ  | HGRALPQKSS |
| Galdieria     | -----      | SKIDSSRPVD | YVLDAFRSAL | ---DAAQKAVQ | SNPLDGPDSV | NKQRSQAEEK | KDDARNLSSS |
| Naegleria     | -----      | SHNDSNENNI | NFHQPFKHP  | -----KN     | TSYKANHSNN | RITHSNSSS  | NPEETPILFS |
| Guillardia    | -----      | PLFSYQKSGT | GGSE       | -----IC     | EVKGAGRSSS | GQGDSRGTA  | EAAAAQWLKE |
| Fonticula     | -----      | STNNSSSASS | SNNSSTSSS  | -----STS    | SSSTSSSTSS | TSSSSSGNSN | NKNTAGAVSS |
| Spizellomyces | -----      | SFLEASKRSS | QGRPONQDPT | ---AD-TV    | IELLKAHKGD | TLVSGAGHAL | QHTTVPKEEP |
| Dictyostelium | KSYSSLEEDL | LLKESKLLNE | DFEDSVKEKP | LHSLISSIAS  | LFRKVEIEIE | DYTTKVGHLS | LNHQKSNLKQ |
| Saccharomyces | -----      | TVEDIGNKEK | GGROKYTEEM | DKAINLLKTN  | IKKEYRHDKY | LERTKVGTYP | GRRTYPGRRT |
| Phycomyces    | -----      | NKYNDKPDV  | GTKDSDTNVV | -----II     | KNKRRKTARE | HLSSQKNSPE | SKRGKNSKSG |
| Ustilago      | -----      | ALRQSSRPNV | QTSSSVSSSL | -----KFI    | ESARKGKERD | SSHPRASSA  | ADHSASLIKE |
| Suillus       | -----      | SQRDSSRSNS | SVQNPHTDIP | -----AAG    | VSKRRKKEKH | SKKKKVGSA  | ARPAVESARA |
| Candida       | -----      | VKNLINRLTA | TGRHEAKRNP | -----TT     | TNASDAYKLF | QNPDKLKALK | RMFAQPKVSK |
| Talaromyces   | -----      | KVTNPAEPGE | QREQPETAKR | -----SK     | SKKKAKSEKL | EEGEQGETG  | ENESTKKKSS |

351

|               |            |            |            |            |            |            |            |
|---------------|------------|------------|------------|------------|------------|------------|------------|
| Tetrahymena   | TEPG       | -----      | -----      | -----      | -----      | -----      | -----      |
| Chondrus      | IRAR       | -----      | -----      | -----      | -----      | -----      | -----      |
| Galdieria     | RISQ       | -----      | -----      | -----      | -----      | -----      | -----      |
| Naegleria     | FQPTNKIIRN | KNSKFKKKS  | LSNETRIPSP | MNNDIDVSDS | LSNSQESSLE | PQTGNYGIPO | FKKELEYNVD |
| Guillardia    | HRSS       | -----      | -----      | -----      | -----      | -----      | -----      |
| Fonticula     | SHSAASKPEP | QTVGKSPVSA | VANSNAPNAG | KPDAPARDPS | RAKHPHSTL  | RRRPRHNHPA | GAPAHQASRS |
| Spizellomyces | LKVN       | -----      | -----      | -----      | -----L     | PSRPPTQKP  | -----      |
| Dictyostelium | DIPKENNNNN | NNNNNNNNNN | NNNNNNNNNN | NNNNNNNNNN | NNNNNNNNNN | NNNNNNNNNN | NSDKLNSSQK |
| Saccharomyces | YPAR       | -----      | -----      | -----      | -----      | -----      | -----      |
| Phycomyces    | FVSRL      | -----      | -----      | -----      | -----      | -----      | -----      |
| Ustilago      | LHAL       | DDQ        | LDALQSQAFS | ISQRLRKLAS | RRSSADOLE  | ETWGPDRLSA | PCRAETREN  |
| Suillus       | SLAG       | SDA        | KRAGLLKLLF | EGSGETNHAA | KDGTWTGWGE | DALRP      | GENKNP     |
| Candida       | RRVKK      | -----      | -----      | -----      | -----      | -----      | -----      |
| Talaromyces   | KKKKSRIKR  | TPGDIKSRMR | KVPVKPRA   | -----      | -----      | -----      | -----      |

421

|               |            |            |             |             |            |            |            |
|---------------|------------|------------|-------------|-------------|------------|------------|------------|
| Tetrahymena   | -----      | -----      | -----       | KEGEVEEIKE  | KRQ        | -----      | -----      |
| Chondrus      | -----      | -----      | SDVRKH      | REFDWDPSLK  | DVR        | -----      | -----      |
| Galdieria     | -----      | -----      | SNYGVES     | SISTSSSSSED | DILLQLDLNK | LNKIG      | -----      |
| Naegleria     | KLLKQV     | -----      | LQVKVTKQ    | KSGEPEENAD  | TEIDFSFILK | QDSESDIFS  | LKELNVIDTI |
| Guillardia    | -----      | -----      | IKTARKS     | RDNLSDRTPK  | RYVPS      | -----      | -----      |
| Fonticula     | RSNPSNPQSG | TSSDVTVKAT | VSAAAARESNS | STGTPSPKKH  | ESAARAQSAP | QRAGSAPKSP | RTHAFINTSS |
| Spizellomyces | -----      | -----      | SVDHTAG     | ACDTAPPTPS  | DGVEQRKPOQ | KPRTP      | -----      |
| Dictyostelium | DNNIKSNK   | -----      | KINESQN     | KKLFSSPPKK  | DISRNIITKP | KVRKPIITKL | KTRRMIESRL |
| Saccharomyces | -----      | -----      | RTYPASRTYS  | D           | -----      | -----      | -----      |
| Phycomyces    | -----      | -----      | LSALEHD     | AKENPKPLED  | HTL        | -----      | -----      |
| Ustilago      | -----      | -----      | ESKAIWS     | ASGSASESSS  | SSRRTADKSS | ADEPKTKLLF | GNELLASSNL |
| Suillus       | -----      | -----      | GLQGSFS     | GDGRPSKIKS  | TGRGQPPHVR | HPLPYTRRVE | G          |
| Candida       | -----      | -----      | HVKEKFO     | KKHTEKNTKT  | STEPFFK    | -----      | -----      |
| Talaromyces   | -----      | -----      | KPPTLTA     | ROAGKKPSRS  | KPARNPPGPP | KPL        | -----      |

491

|               |            |            |            |             |            |            |             |
|---------------|------------|------------|------------|-------------|------------|------------|-------------|
| Tetrahymena   | -----      | -----      | -----      | -----       | -----      | SSRFIFNSSF | NSIQIPLDDV  |
| Chondrus      | -----      | -----      | -----      | -----       | -----      | TVDYSSWPEV | GNCPAQLV-P  |
| Galdieria     | -----      | -----      | -----      | -----       | -----      | LSPWK      | VLDDFSQOLE  |
| Naegleria     | EEQEEENIEK | PSTKQVDTID | LKFLKPOIKF | KNFKDEKEVV  | ESVKLGTSEL | KNVYQPSKG  | HNYRKDLVDE  |
| Guillardia    | -----      | -----      | -----      | -----       | -----      | DVTW       | NALPKPVGFQ  |
| Fonticula     | STKSSSSATA | PVSTGGAAAP | APAPIEGEGV | LFKRVPAAQAP | WMGLGHQGT  | QAAWSSAVVS | ROEDAGRPHK  |
| Spizellomyces | -----      | -----      | -----      | -----       | -----      | RAKWQ      | TVTPTFPFNYQ |
| Dictyostelium | LQIESEDKSK | EISNLNDDKE | NSTTENQSLI | LDMTGILKRR  | HKLSDPMDAT | MQEFKEKLT  | DSNRLNEQEM  |
| Saccharomyces | -----      | -----      | -----      | -----       | -----      | SNSYTFRINV | QKIRHALVRY  |
| Phycomyces    | -----      | -----      | -----      | -----       | -----      | SSSW       | SQIDNEIVYK  |
| Ustilago      | RWRDGGKGLI | Q          | -----      | S           | LVYSGPFADE | QKKWTESITG | SVTPKSVPVD  |
| Suillus       | -----      | -----      | -----      | -----       | LFDD       | ARDLNAPSSS | GPSSINNVLE  |
| Candida       | -----      | -----      | -----      | -----       | -----      | DKSTDKYLTS | NNIKKHNLQ   |
| Talaromyces   | -----      | -----      | -----      | -----       | -----      | NIEVSDTLVD | GLQKEDIDFK  |

561

|               |            |            |            |            |            |            |            |
|---------------|------------|------------|------------|------------|------------|------------|------------|
| Tetrahymena   | NIINIENEQ  | -----      | -----      | -----      | -----      | -----      | -----      |
| Chondrus      | VLSGQDPSI  | -----      | -----      | -----      | -----      | -----      | -----      |
| Galdieria     | TVEAPNPEK  | -----      | -----      | -----      | -----      | -----      | -----      |
| Naegleria     | PIAPHQKFL  | -----      | -----      | -----      | -----      | -----      | -----      |
| Guillardia    | LIEAHGPD   | -----      | -----      | -----      | -----      | -----      | -----      |
| Fonticula     | KKKSLGELAS | AGPWFLPEGS | AIELLTASEA | IPTVENDPAL | IDASVAFIES | ISLDNLPPEV | VKYFDGEEHV |
| Spizellomyces | AVERTDDAI  | -----      | -----      | -----      | -----      | -----      | -----      |
| Dictyostelium | SDTPPRPLK  | -----      | -----      | -----      | -----      | -----      | -----      |
| Saccharomyces | NQDGVQKH   | -----      | -----      | -----      | -----      | -----      | -----      |
| Phycomyces    | RVEPPREVK  | -----      | -----      | -----      | -----      | -----      | -----      |
| Ustilago      | KVAPLREMQ  | -----      | -----      | -----      | -----      | -----      | -----      |
| Suillus       | DIDPPSEHK  | -----      | -----      | -----      | -----      | -----      | -----      |
| Candida       | FVAPKNE    | -----      | -----      | -----      | -----      | -----      | -----      |
| Talaromyces   | ALDYDTPP   | -----      | -----      | -----      | -----      | -----      | -----      |





1331

|               |            |            |            |            |            |            |            |            |
|---------------|------------|------------|------------|------------|------------|------------|------------|------------|
| Tetrahymena   | -----      | -----      | -----      | -----      | -----      | -----      | -----      |            |
| Chondrus      | -----      | -----      | -----      | -----      | L          | AKRPRSETYD | YSNYDLTSLT | RDRFRVWEL- |
| Galdieria     | -----      | -----      | -----      | -----      | -----      | -----      | -----      | -----      |
| Naegleria     | -----      | -----      | -----      | -----      | -----      | -----      | -----      | -----      |
| Guillardia    | -----      | -----      | T          | GVQPSSGPKN | FEQASKGKEV | KSQQALEQDR | KLLLNKGLV  | NVQPVLEKK  |
| Fonticula     | ALRSH      | FHAFVKNVSM | SRDAGLFFRS | LEAQQIPDDI | WNSDIPVACI | SNDPNAPGSS | FVHRNKNFLK | -----      |
| Spizellomyces | -----      | -----      | -----      | -----      | -----      | -----      | -----      | -----      |
| Dictyostelium | -----      | -----      | -----      | -----      | -----      | -----      | -----      | -----      |
| Saccharomyces | TESRKYI    | SDMMKRDWYK | DIPSTQTPNF | FHASDVSTWE | VNSTFTDIND | KQILRKLYFK | YLDVKNLALK | -----      |
| Phycomyces    | -----      | -----      | -----      | GHVESMF    | RSLRRTQSNL | FSASKYPIPI | L          | -----      |
| Ustilago      | ESKIRSNLEA | VRAKQASLNS | LILPNVEALN | AREQYRTEQL | AKNPDALQRF | LQERKSGVAA | GMPLAPGQLS | -----      |
| Suillus       | SRIRANLASA | KDRQFRAWNF | PANISGPEEM | ETWWNALDFG | RRKTAVSSSG | EG--EETLS  | RLQDLVAGVE | -----      |
| Candida       | -----      | -----      | -----      | -----      | -----      | KKYV       | SNLLRFPDTK | ISQRL      |
| Talaromyces   | NITE       | ILATTNQKGD | TNKPALSPLT | VLSEKIETSR | KVVQSVKQKI | DNILEEEREA | YIRPKLFGME | -----      |

1401

|               |            |            |            |            |            |            |            |            |
|---------------|------------|------------|------------|------------|------------|------------|------------|------------|
| Tetrahymena   | -----      | -----      | -----      | -----      | IGKP       | AFLDYMNFLH | EAYKFETMNL | DLSYIGAWV- |
| Chondrus      | -----      | -----      | -----      | -----      | RVAP       | LVNDKMAPRN | LICLGEEDRF | RLKYNLKEVS |
| Galdieria     | -----      | -----      | -----      | -----      | CLND       | YIKALRLSLG | LEDMPQSRHF | SVSGLSSTEL |
| Naegleria     | -----      | -----      | -----      | -----      | TDKF       | LMNEYVLTLL | KAFFIEQ    | -----      |
| Guillardia    | AEPTNVVMNE | NVEQQASNLS | DKGNS      | -----      | RGAA       | KQRISQAAGK | QTNLKEGDQQ | TISQGRRRV  |
| Fonticula     | NGARWQGR   | RPDRRTKVFA | PPGLEKARI  | -----      | KVD        | QFRDSLSSVR | MARNAEGTSP | ADASAAAAA  |
| Spizellomyces | -----      | -----      | -----      | -----      | ANIS       | LMQLYDEYER | LRNRCNLKP  | FVPTKGHKIF |
| Dictyostelium | -----      | -----      | -----      | -----      | TQDE       | IKYHYALALK | ASKLYSQFSK | IQKSRN     |
| Saccharomyces | NQVITRQEPD | MSK        | -----      | -----      | KDEI       | MNRIKSLOAR | NDHRDNGSNK | RYSNFGPTRL |
| Phycomyces    | -----      | -----      | -----      | -----      | KQLK       | SLSEKQLKME | RQSRKTGNSK | SIEPND     |
| Ustilago      | AENAASQSPS | TPPPAETSDA | SSSNTVLPDD | VLKPIEPNDI | SPRRKQAESR | FVRMRNARTL | RLRELAKLGA | -----      |
| Suillus       | SPVVTVEENG | LVEEEGPKAN | ENGVPFNRK  | LFRPASTSIE | ILRQLSRDGR | EETLRAEAEF | EAMGREKIVW | -----      |
| Candida       | -----      | -----      | -----      | -----      | KKVH       | QLYEKIGSIR | KKSWQEKDKK | SQVYHPKFKF |
| Talaromyces   | IGIQNLVNNR | VVDRPTNLKP | TNDWKVVYI  | -----      | INEF       | KIGDGGLWNH | FVGMRSRREK | ALSF EKRS  |

1471

|               |             |            |            |            |        |       |       |       |
|---------------|-------------|------------|------------|------------|--------|-------|-------|-------|
| Tetrahymena   | -----       | -----      | -----      | -----      | -----  | ----- | ----- | ----- |
| Chondrus      | DVKTEHVAKF  | ITSLGRIYTY | -----      | -----      | -----  | ----- | ----- | ----- |
| Galdieria     | ADILASTSFC  | AFHLIK     | -----      | -----      | -----  | ----- | ----- | ----- |
| Naegleria     | -----       | -----      | -----      | -----      | -----  | ----- | ----- | ----- |
| Guillardia    | NSQGNAAITG  | NHGRDNRGSY | TAKNSVQGRK | PVTHQOMQGG | QRSS   | ----- | ----- | ----- |
| Fonticula     | AALATAVATA  | TAATSAAASI | PPAAPVAVAA | HSS        | -----  | ----- | ----- | ----- |
| Spizellomyces | VNRLRKKANL  | DLY        | -----      | -----      | -----  | ----- | ----- | ----- |
| Dictyostelium | -----       | -----      | -----      | -----      | -----  | ----- | ----- | ----- |
| Saccharomyces | OTKLRAYAKK  | GALRRKLLER | SNKFHI     | -----      | -----  | ----- | ----- | ----- |
| Phycomyces    | -----       | -----      | -----      | -----      | -----  | ----- | ----- | ----- |
| Ustilago      | KDANHNKSLD  | KLILYQPRS  | -----      | -----      | -----  | ----- | ----- | ----- |
| Suillus       | GLVGNNGGIVN | SETKEVPEDG | SSVSTITQSS | EMGTVDAVEQ | TSQEKE | ----- | ----- | ----- |
| Candida       | -----       | -----      | -----      | -----      | -----  | ----- | ----- | ----- |
| Talaromyces   | DDHYILNLR   | LAMQKKFRE  | EEDRIDKERG | IVVYEELKGG | DSAGSA | ----- | ----- | ----- |
